# Supplementary material for: Stepwise protein targeting into plastoglobules are facilitated by three hydrophobic regions of rice phytoene synthase 2
Source: Front Plant Sci. 2023 May 31;14:1181311. doi: 10.3389/fpls.2023.1181311 (PMC10264786; doi:10.3389/fpls.2023.1181311)
Supplement: Supplementary file 2 [file Table_1.xlsx]

## Sheet: Table S1
Supplementary Table S1. The cleavage site prediction of the N-terminal 80-amino-acid sequence of OsPSY2 (PTp) with cleavage scores estimated by TargetP 2.0
		N-terminal 80 amino acid in the prediction-based transit peptide of OsPSY2
No.		1	2	3	4	5	6	7	8	9	10	11	12	13	14	15	16	17	18	19	20
aa		M	A	S	S	S	S	A	A	A	L	W	T	A	A	P	H	P	H	G	S
CS		3.2e-05	3e-06	1e-06	2e-06	3e-06	7e-06	3.9e-05	6.2e-05	3.2e-05	1.5e-05	4.8e-05	4e-05	5.1e-05	2e-06	1e-06	1e-06	1e-06	4e-06	6e-06	2.1e-05
No.		21	22	23	24	25	26	27	28	29	30	31	32	33	34	35	36	37	38	39	40
aa		C	I	R	I	H	A	I	F	H	Q	R	H	Q	R	R	G	R	R	P	V
CS		3.6e-05	1.1e-05	3.3e-05	2.8e-05	0.000233	0.002361	0.000172	0.000672	0.000134	0.000102	4.2e-05	4.1e-05	3.5e-05	2.8e-05	3.7e-05	3.2e-05	2.8e-05	1.5e-05	3.8e-05	0.000145
No.		41	42	43	44	45	46	47	48	49	50	51	52	53	54	55	56	57	58	59	60
aa		V	V	A	S	S	V	R	P	L	Q	A	A	S	L	A	V	A	T	A	P
CS		0.000545	0.003188	0.103901	0.014043	0.000259	1.9e-05	3.2e-05	0.000401	0.0009	0.002696	0.023088	0.025559	0.006405	0.020829	0.027895	0.001427	0.033626	0.00232	0.00126	0.000518
No.		61	62	63	64	65	66	67	68	69	70	71	72	73	74	75	76	77	78	79	80
aa		V	A	V	A	S	R	R	T	A	A	E	E	A	V	Y	E	V	V	L	R
CS		0.000752	0.01053	0.007667	0.131182	0.047569	0.027637	0.081195	0.047384	0.078195	0.222559	0.013525	0.016344	0.003533	0.000111	0.000973	0.000515	3.9e-05	7.4e-05	0.00113	0.007534
Bolded letters indicate amino acids having a high cleavage score over 0.1. A red bolded letter indicates the experimentally verified alanine (A) site. No., amino acid position from N-terminus of OsPSY2; aa, amino acid that displayedas a single digit code; CS, cleavage score.
